# Supplementary material for: Lipofuscin Granule Accumulation Requires Autophagy Activation
Source: PubMed Central journal article supplement — Mol Cells. 2023 Jul 13;46(8):486–95. doi: 10.14348/molcells.2023.0019 (PMC10440269; doi:10.14348/molcells.2023.0019), 2023-07-13
Supplement: molce-46-8-486-supple1.pdf [file molce-46-8-486-supple1.pdf]

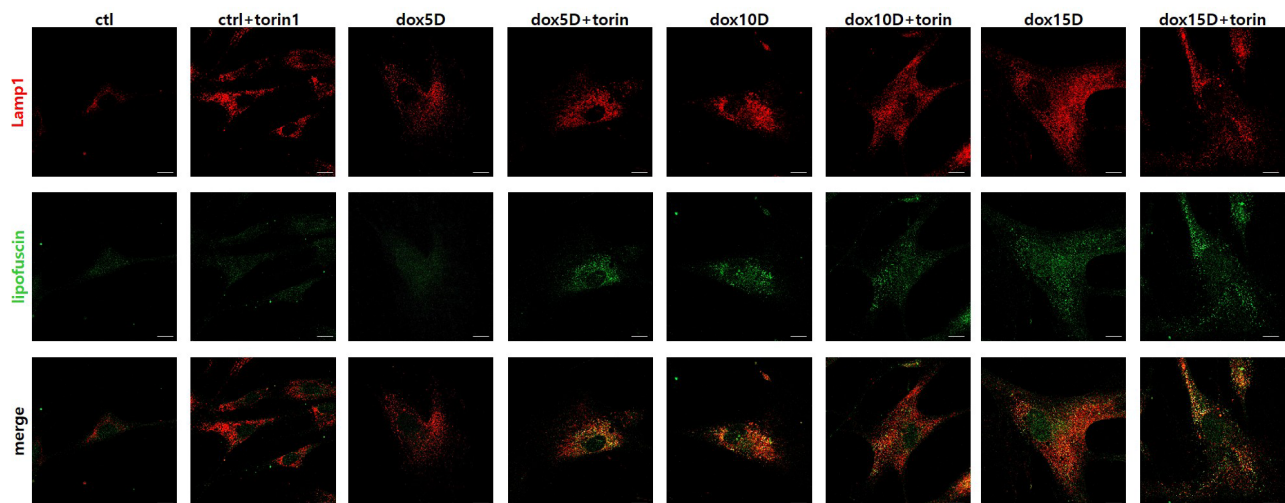

**Supplemental Fig. 1. Granular change of cytosolic lipofuscin fluorescence during prolonged chase after doxorubicin chase.** Fibroblasts either mock treated or chased for 5, 10, or 15 days after doxorubicin pulse were treated with Torin-1 for 4 h prior to application for confocal microscopic examination for autofluorescence and lysosomes (LTR). Upon Torin-1 treatment, the number of yellow puncta, which are likely the lipofuscin-containing autolysosomes, increased (dox5D+torin). However, in the control cells, the treatment barely induced formation of yellow puncta (ctl+torin). In addition, in the cells chased for 10 or 15 days, where yellow puncta were already present abundantly, Torin-1 treatment did not alter their levels (dox10D+torin and dox15D+torin).

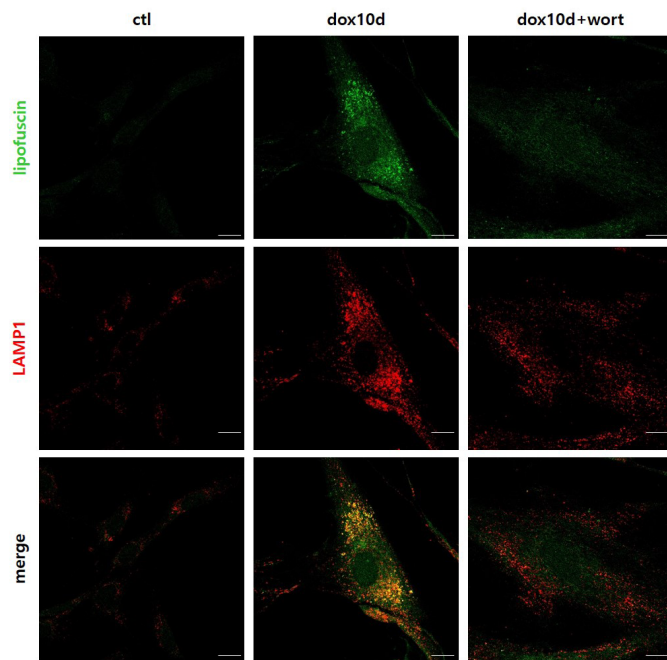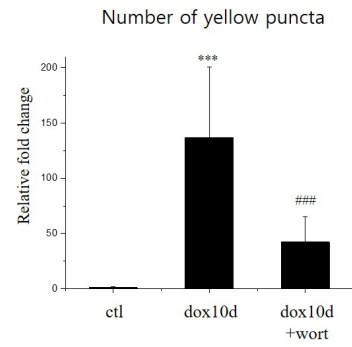

**Supplemental Fig. 2. Attenuation of lipofuscin granule accumulation through an inhibition of autophagy activation.** Fibroblasts were chased for 10 days after doxorubicin pulse (dox10d) or chased in the presence of 0.2 μM Wortmannin throughout the chase period (dox10d+wort). Cells were applied to confocal microscopic examination for lipofuscin autofluorescence and lysosomes (LAMP1). Upon Wortmannin treatment, the accumulation of yellow puncta, which are likely the lipofuscin-containing autolysosomes, was substantially attenuated. The numbers of lipofuscin granules with the size over 0.5 μm<sup>2</sup> in 10 cells from each population was averaged, and mean values were plotted in the bar graph. (\*\*\*)*p* < 0.001, ###*p* < 0.001 by ANOVA, the significance of the difference from the untreated cells (ctl), and of the difference from of 'dox10d).
